# Supplementary material
Source: HighWire-hosted journal article supplement (https://dmd.aspetjournals.org/highwire/filestream/79720/field_highwire_adjunct_files/0/1050_supp_fig.pdf)

DMD-AR-2022-001050R1

Supplemental Information

*Drug Metabolism and Disposition*

PHARMACOKINETIC INTERACTIONS OF A LICORICE DIETARY SUPPLEMENT  
WITH CYTOCHROME P450 ENZYMES IN FEMALE PARTICIPANTS

Jialin Liu,<sup>1</sup> Suzanne Banuvar,<sup>2</sup> Marlos Viana,<sup>2</sup> Elena Barengolts,<sup>2</sup> Shao-Nong Chen,<sup>2</sup>  
Guido F. Pauli,<sup>2</sup> and Richard B. van Breemen\*<sup>1,2</sup>

<sup>1</sup>Linus Pauling Institute, College of Pharmacy, Oregon State University, Corvallis, OR

<sup>2</sup>UIC Center for Botanical Dietary Supplements Research, Department of  
Pharmaceutical Sciences, University of Illinois at Chicago, Chicago, IL

Supplemental Figure. Semi-log plot of the average concentration-time curves,  $\ln(\text{concentration})$  vs.  $\text{linear}(\text{time})$ , for four cytochrome P50 probe substrates pre- and post-consumption of a licorice extract from *G. glabra* by 14 female participants for 14 days. Error bars denote  $\pm\text{SE}$ .

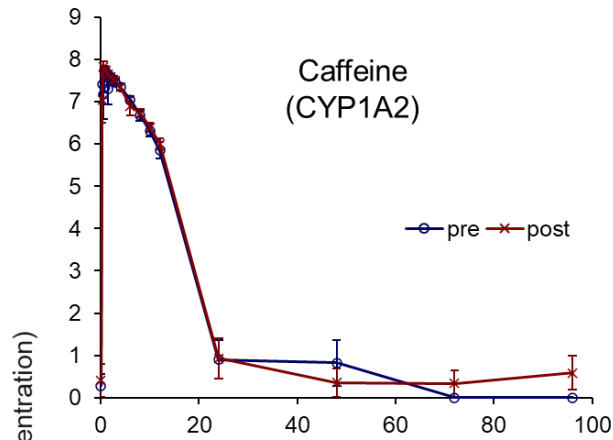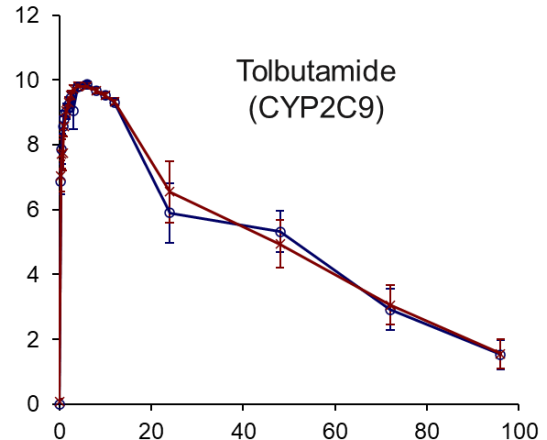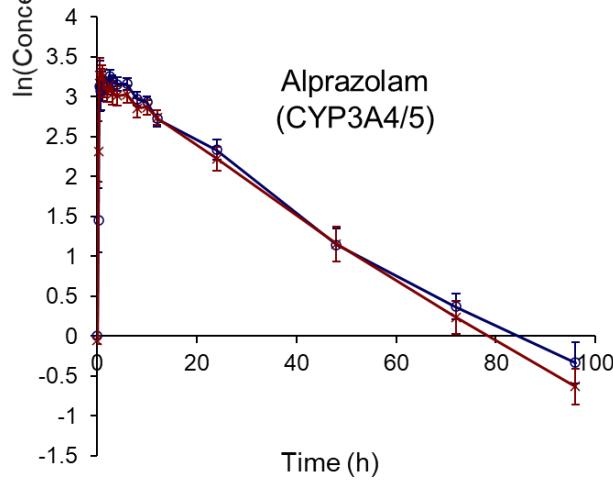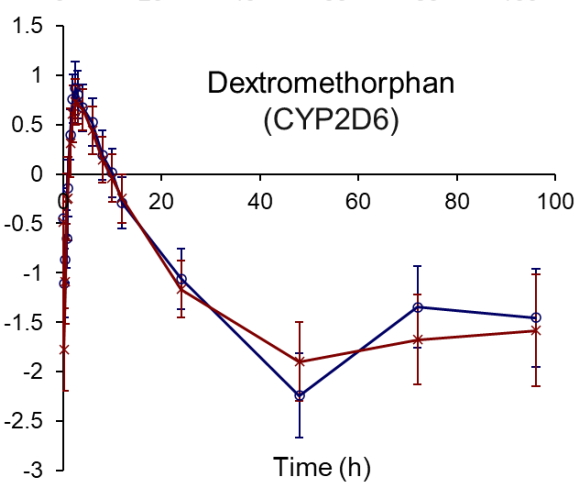

Supplement: 1050_supp_fig.pdf [file 1050_supp_fig.pdf]
